# Supplementary material for: A 60-year atmospheric nitrate isotope record from a Southeast Greenland ice core with minimal post-depositional alteration
Source: Copernicus journal article supplement (doi:10.5194/egusphere-2024-3937), 2024-12-20
Supplement: Supplementary file 1 [file egusphere-2024-3937-supplement.zip]

# **A 60-year atmospheric nitrate isotope record from a Southeast Greenland ice core with minimal post-depositional alteration**

Zhao Wei<sup>1</sup>, Shohei Hattori<sup>1,2,3\*</sup>, Asuka Tsuruta<sup>3</sup>, Zhuang Jiang<sup>4</sup>, Sakiko Ishino<sup>5</sup>, Koji Fujita<sup>6</sup>, Sumito Matoba<sup>7</sup>, Lei Geng<sup>4</sup>, Alexis Lamothe<sup>8</sup>, Ryu Uemura<sup>6</sup>, Naohiro Yoshida<sup>3,9</sup>, Joel Savarino<sup>8</sup>, and Yoshinori Iizuka<sup>7</sup>

<sup>1</sup>International Center for Isotope Effects Research (ICIER), Nanjing University, Nanjing 210023, China

<sup>2</sup>Frontiers Science Center for Critical Earth Material Cycling, State Key Laboratory for Mineral Deposits Research, School of Earth Sciences and Engineering, Nanjing University, Nanjing 210023, China

<sup>3</sup>Department of Chemical Science and Engineering, School of Materials and Chemical Technology, Tokyo Institute of Technology, Kanagawa 226-8502, Japan

<sup>4</sup>School of Earth and Space Sciences, University of Science and Technology of China, Hefei, Anhui, China

<sup>5</sup>Institute of Nature and Environmental Technology, Kanazawa University, Kakuma-machi, Kanazawa, Ishikawa 920-1192, Japan

<sup>6</sup>Graduate School of Environmental Studies, Nagoya University, Nagoya, Japan

<sup>7</sup>Institute of Low-Temperature Science, Hokkaido University, Sapporo, Japan

<sup>8</sup>Univ. Grenoble Alpes, CNRS, IRD, INRAE, G-INP, Institut des Géosciences de l'Environnement, Grenoble, France

<sup>9</sup>National Institute of Information and Communications Technology, Koganei, Tokyo 184-8795, Japan

<sup>10</sup>Earth-Life Science Institute (ELSI), Institute of Science Tokyo, Tokyo 152-8550, Japan

*Correspondence to:* Shohei Hattori ([hattori@nju.edu.cn](mailto:hattori@nju.edu.cn))

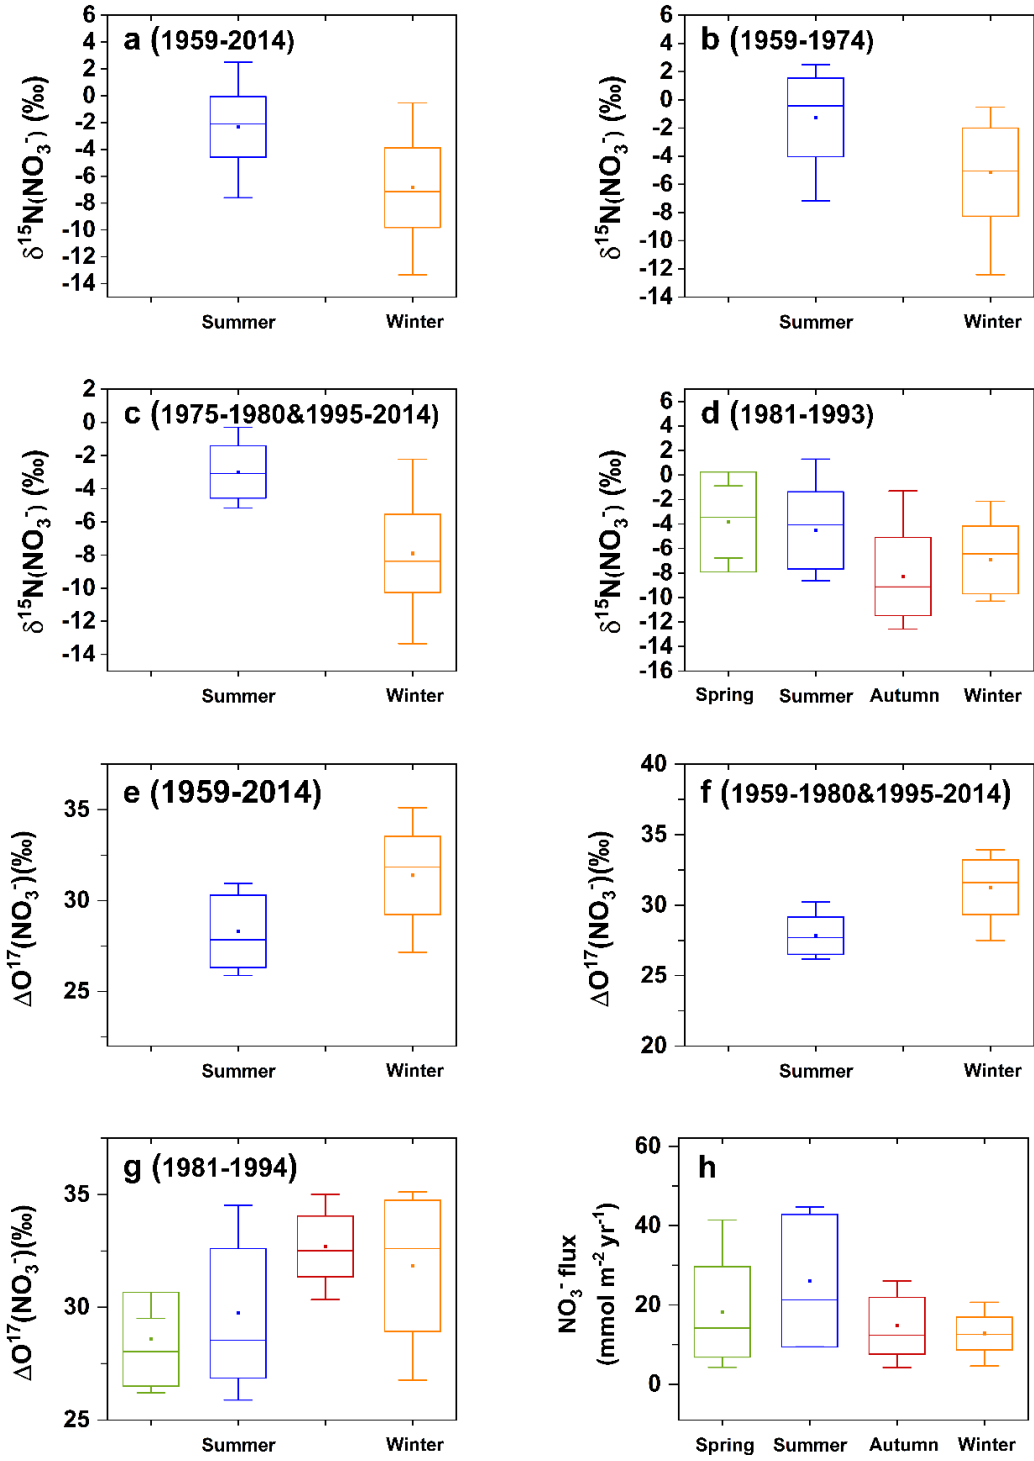

**Figure S1.** The seasonal change of observed  $\text{NO}_3^-$  isotopes and concentration SE-Dome ice core. (a)  $\delta^{15}\text{N}(\text{NO}_3^-)$  (1959-2014), (b)  $\delta^{15}\text{N}(\text{NO}_3^-)$  (1959-1974), (c)  $\delta^{15}\text{N}(\text{NO}_3^-)$  (1975-1980 & 1995-2014), (d)  $\delta^{15}\text{N}(\text{NO}_3^-)$  (1981-1993), (e)  $\Delta^{17}\text{O}(\text{NO}_3^-)$  (1959-2014), (f)  $\Delta^{17}\text{O}(\text{NO}_3^-)$  (1959-1980 & 1995-2014), (g)  $\Delta^{17}\text{O}(\text{NO}_3^-)$  (1981-1994) and (h) the  $\text{NO}_3^-$  flux ( $\text{mmol m}^{-2} \text{yr}^{-1}$ ).

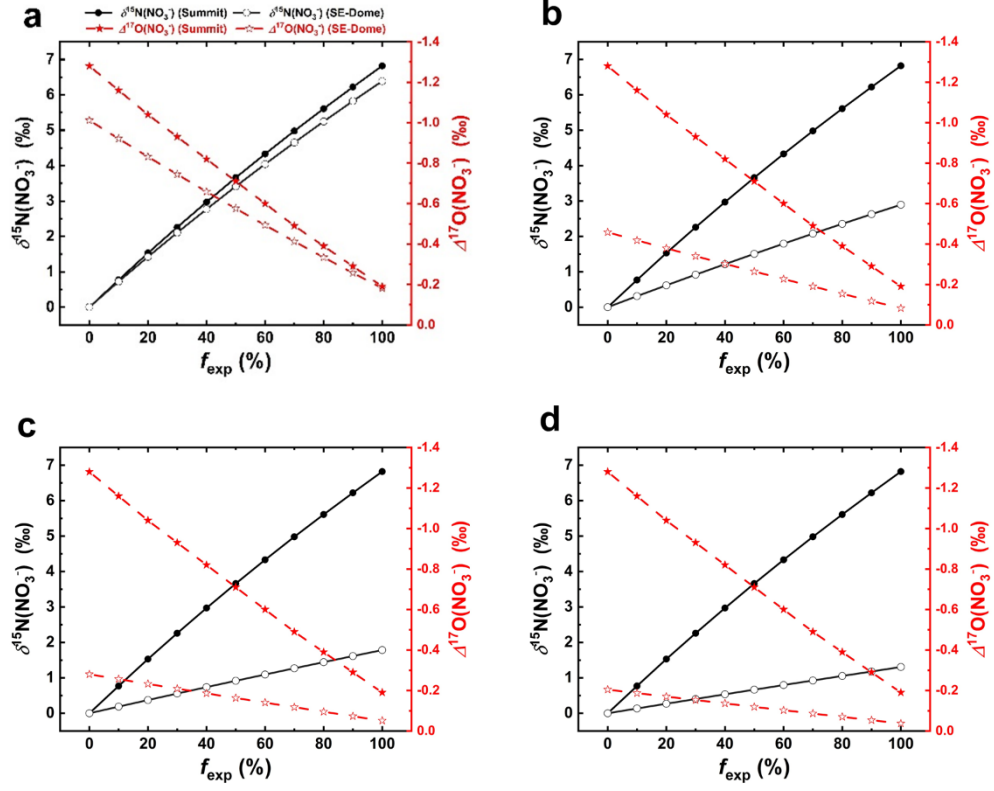

**Figure S2.** The sensitivity of the changes in  $\delta^{15}\text{N}(\text{NO}_3^-)$  and  $\Delta^{17}\text{O}(\text{NO}_3^-)$  of the ice-core nitrate to  $f_{\text{exp}}$  with different snow accumulation rate ( $A$ ). (a)  $A = 0.25 \text{ m w e a}^{-1}$  which equals to that in Summit; (b)  $A = 0.6 \text{ m w e a}^{-1}$ ; (c)  $A = 1.01 \text{ m w e a}^{-1}$ ; (d)  $A = 1.4 \text{ m w e a}^{-1}$ .

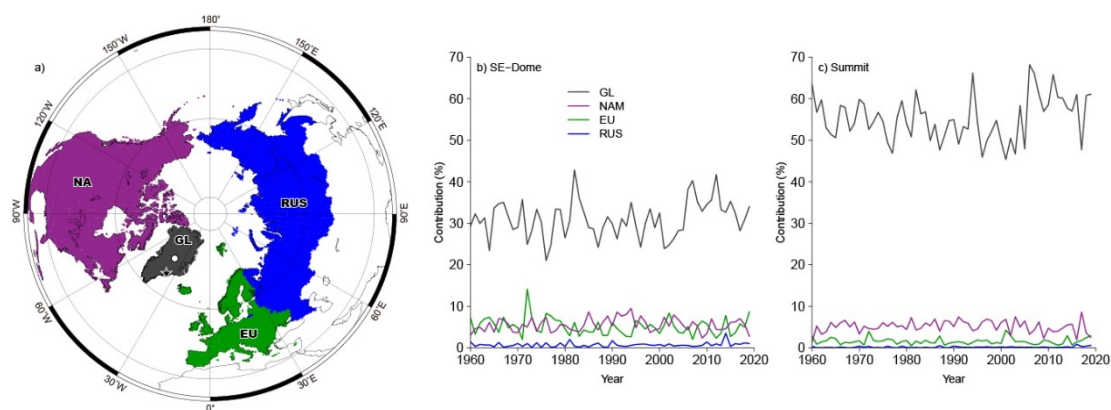

**Figure S3.** Time series of regional contributions of air mass origins for SE-Dome (b) and Summit 39 (c). The regions are shown at the top. Greenland in gray, North America in purple (Canada and the 40 U.S.), Europe (EU) in green, Russia in blue.

**Table S1** The samples and corresponding years

| Year | Seasonal | $\delta^{18}\text{O}$ | $\Delta^{17}\text{O}$ | $\delta^{15}\text{N}$ | Year | Seasonal | $\delta^{18}\text{O}$ | $\Delta^{17}\text{O}$ | $\delta^{15}\text{N}$ |
|------|----------|-----------------------|-----------------------|-----------------------|------|----------|-----------------------|-----------------------|-----------------------|
| 1959 | summer   | 79                    | 27.4                  | 0.5                   | 1988 | spring   | 88.5                  | 32.8                  | -3.4                  |
| 1959 | winter   | 76.6                  | 26.5                  | -1.2                  | 1988 | summer   | 86.7                  | 33.4                  | -6.2                  |
| 1960 | summer   | 83.1                  | 30                    | -4.3                  | 1988 | autumn   | 85.5                  | 34                    | -7.9                  |
| 1961 | winter   | 76.5                  | 27.2                  | -1.6                  | 1988 | winter   | 87.5                  | 33.9                  | -6.1                  |
| 1961 | summer   | 80.1                  | 27.7                  | -0.5                  | 1989 | spring   | 80.9                  | 29                    | -2.4                  |
| 1962 | winter   | 78.1                  | 27.5                  | -0.5                  | 1989 | summer   | 86.8                  | 34.5                  | -8.6                  |
| 1962 | summer   | 77.7                  | 28.4                  | 1.4                   | 1989 | autumn   | 80.9                  | 30.3                  | -1.3                  |
| 1963 | winter   | 87.1                  | 33.9                  | -3.4                  | 1989 | winter   | 83.9                  | 31.9                  | -5.3                  |
| 1963 | summer   | 76.6                  | 27.8                  | 2                     | 1990 | spring   | 74                    | 26.2                  | -3.1                  |
| 1964 | winter   | 85.9                  | 33.4                  | -2                    | 1990 | summer   | 77.8                  | 30                    | -8.3                  |
| 1964 | summer   | 76.5                  | 26.7                  | 0.1                   | 1990 | autumn   | 86                    | 32.6                  | -9.7                  |
| 1965 | winter   | 79.8                  | 31.5                  | -4.4                  | 1991 | spring   | 74.7                  | 28                    | -1.6                  |
| 1965 | summer   | 80.7                  | 30.2                  | 2.5                   | 1991 | summer   | 70.4                  | 25.9                  | -0.5                  |
| 1966 | winter   | 77                    | 30.7                  | -6                    | 1991 | autumn   | 84.3                  | 32.5                  | -9.1                  |
| 1966 | summer   | 73                    | 26.9                  | -0.3                  | 1991 | winter   | 83.7                  | 32.8                  | -6.4                  |
| 1967 | winter   | 80.3                  | 31.1                  | -7.4                  | 1992 | spring   | 79.3                  | 29.5                  | 4.8                   |
| 1967 | summer   | 73.7                  | 26.6                  | -1.4                  | 1992 | summer   | 78.6                  | 28.1                  | -6.3                  |
| 1968 | winter   | 79.8                  | 30.4                  | -4.1                  | 1992 | autumn   | 82.8                  | 32                    | -7.9                  |
| 1968 | summer   | 76                    | 27.4                  | -1.8                  | 1993 | summer   | 87                    | 34.2                  | -8.6                  |
| 1969 | winter   | 80.9                  | 30.9                  | -5.7                  | 1993 | autumn   | 85.6                  | 34.5                  | -9.8                  |
| 1969 | summer   | 73                    | 26.4                  | -0.3                  | 1993 | winter   | 84.7                  | 32.6                  | -10                   |
| 1970 | winter   | 83.9                  | 32                    | -4.3                  | 1994 | spring   | 76                    | 27.8                  | -0.9                  |
| 1970 | summer   | 75.8                  | 27.2                  | -1.8                  | 1994 | summer   | 78.9                  | 28.2                  | -4                    |
| 1971 | winter   | 82.3                  | 32.1                  | -7                    | 1994 | winter   | 82.4                  | 29.5                  | -4.4                  |
| 1971 | summer   | 75.8                  | 27.4                  | 0.8                   | 1994 | autumn   | 83.4                  | 31.2                  | -9.1                  |
| 1972 | winter   | 82.3                  | 32.7                  | -9                    | 1995 | summer   | 83.1                  | 31.7                  | -7.6                  |
| 1972 | summer   | 74.3                  | 26.6                  | -7.2                  | 1996 | winter   | 78.1                  | 29.4                  | -5.7                  |
| 1973 | winter   | 78.9                  | 30.4                  | -6.2                  | 1996 | summer   | 77.3                  | 28.1                  | -1.9                  |
| 1973 | summer   | 75.7                  | 27.6                  | -4.1                  | 1997 | winter   | 82.7                  | 32.7                  | -9.2                  |
| 1974 | winter   | 79.2                  | 30.4                  | -7.1                  | 1997 | summer   | 78                    | 28.2                  | -0.5                  |
| 1974 | summer   | 75.6                  | 27.7                  | -5.8                  | 1998 | winter   | 82.3                  | 32.2                  | -9.7                  |
| 1975 | winter   | 79.7                  | 31.8                  | -12.4                 | 1998 | summer   | 77.2                  | 27.6                  | -1.6                  |
| 1975 | summer   | 80.6                  | 28.9                  | -0.3                  | 1999 | winter   | 83.1                  | 31.6                  | -4.8                  |
| 1976 | winter   | 80.9                  | 30.4                  | -8.3                  | 1999 | summer   | 78.4                  | 28.7                  | -1.2                  |
| 1976 | summer   | 75.4                  | 26.9                  | -3                    | 2000 | winter   | 83                    | 32.3                  | -8.6                  |
| 1977 | winter   | 81.5                  | 31.4                  | -12.8                 | 2000 | summer   | 74.9                  | 27.6                  | -3                    |
| 1977 | summer   | 77.8                  | 28.2                  | -3.6                  | 2001 | winter   | 83.7                  | 32.9                  | -8.4                  |
| 1978 | winter   | 87.2                  | 32.5                  | -13.3                 | 2001 | summer   | 78.3                  | 29.5                  | -3.8                  |
| 1978 | summer   | 76.1                  | 27.9                  | -2                    | 2002 | winter   | 81.1                  | 31.1                  | -9                    |
| 1979 | winter   | 85.5                  | 33                    | -9.2                  | 2002 | summer   | 74.1                  | 26.7                  | -4.2                  |
| 1979 | summer   | 76.6                  | 27.8                  | -4.7                  | 2003 | winter   | 80.9                  | 31.8                  | -9.7                  |
| 1980 | winter   | 84.1                  | 32.9                  | -8.6                  | 2003 | summer   | 76.9                  | 28.4                  | -3.2                  |

| Year | Seasonal | $\delta^{18}\text{O}$ | $\Delta^{17}\text{O}$ | $\delta^{15}\text{N}$ | Year | Seasonal | $\delta^{18}\text{O}$ | $\Delta^{17}\text{O}$ | $\delta^{15}\text{N}$ |
|------|----------|-----------------------|-----------------------|-----------------------|------|----------|-----------------------|-----------------------|-----------------------|
| 1980 | summer   | 74.6                  | 26.7                  | -3.7                  | 2004 | winter   | 81.7                  | 31.4                  | -6                    |
| 1981 | winter   | 80.7                  | 31                    | -7.2                  | 2004 | summer   | 76.6                  | 27.8                  | -2.2                  |
| 1981 | spring   | 77.5                  | 28.8                  | -4.6                  | 2005 | winter   | 82.7                  | 31.3                  | -5.4                  |
| 1981 | summer   | 75.1                  | 27.3                  | -2.4                  | 2005 | summer   | 81.7                  | 30.9                  | -5.2                  |
| 1981 | autumn   | 84.7                  | 33.9                  | -12.6                 | 2006 | winter   | 80.2                  | 30.1                  | -2.2                  |
| 1981 | winter   | 74.6                  | 26.8                  | -2.1                  | 2006 | summer   | 76.9                  | 27.9                  | -1.9                  |
| 1982 | Spring   | 76.1                  | 28.2                  | -4.4                  | 2007 | winter   | 82.2                  | 32.1                  | -6.8                  |
| 1982 | summer   | 81.3                  | 31.9                  | -7.5                  | 2007 | summer   | 75.7                  | 28.8                  | -3.5                  |
| 1982 | autumn   | 83.2                  | 32.1                  | -9.5                  | 2008 | winter   | 82.6                  | 33.5                  | -9.1                  |
| 1982 | winter   | 72.3                  | 26.8                  | -4.6                  | 2008 | summer   | 77.1                  | 28.8                  | -3.7                  |
| 1983 | Spring   | 72.1                  | 26.8                  | -3.2                  | 2009 | winter   | 78.1                  | 31.6                  | -9                    |
| 1983 | summer   | 80.1                  | 28.9                  | -2.3                  | 2009 | summer   | 71.7                  | 27.3                  | -3.6                  |
| 1983 | autumn   | 87                    | 33.6                  | -6.1                  | 2010 | winter   | 80.9                  | 32.8                  | -7.3                  |
| 1983 | winter   | 86.4                  | 34.1                  | -10.3                 | 2010 | summer   | 74.7                  | 28.1                  | -4                    |
| 1984 | Spring   | 76.3                  | 27.8                  | -6.8                  | 2011 | winter   | 81.9                  | 32.5                  | -5                    |
| 1984 | Summer   | 73.7                  | 27.6                  | -3.9                  | 2011 | summer   | 70.2                  | 26.2                  | -2.4                  |
| 1984 | autumn   | 83.1                  | 31.5                  | -3.3                  | 2012 | winter   | 82.8                  | 33.6                  | -7.7                  |
| 1984 | winter   | 82.7                  | 32.3                  | -9.4                  | 2012 | summer   | 73.6                  | 27.2                  | -1.4                  |
| 1985 | Spring   | 71.5                  | 27.6                  | -5.5                  | 2013 | winter   | 75.1                  | 29.8                  | -8.4                  |
| 1985 | summer   | 73.7                  | 26.7                  | -2                    | 2013 | summer   | 73.7                  | 26.8                  | -1.6                  |
| 1985 | autumn   | 82.8                  | 31.8                  | -6.2                  | 2014 | winter   | 65.1                  | 24.6                  | -6.3                  |
| 1985 | winter   | 86.2                  | 34.4                  | -7.4                  | 2014 | summer   | 67                    | 24.2                  | -3.9                  |
| 1986 | Spring   | 70                    | 26.2                  | -5.3                  | 2015 | winter   | 82.1                  | 32.4                  | -7.5                  |
| 1986 | summer   | 83.7                  | 31.4                  | -4.2                  |      |          |                       |                       |                       |
| 1986 | autumn   | 89.6                  | 35                    | -11.4                 |      |          |                       |                       |                       |
| 1987 | spring   | 81.4                  | 32.7                  | -13.5                 |      |          |                       |                       |                       |
| 1987 | summer   | 77.4                  | 28.2                  | 1.3                   |      |          |                       |                       |                       |
| 1987 | autumn   | 83.4                  | 32.9                  | -11.9                 |      |          |                       |                       |                       |
| 1987 | winter   | 90.4                  | 35.1                  | -10.1                 |      |          |                       |                       |                       |
| 1988 | spring   | 88.5                  | 32.8                  | -3.4                  |      |          |                       |                       |                       |
| 1988 | summer   | 86.7                  | 33.4                  | -6.2                  |      |          |                       |                       |                       |
| 1988 | autumn   | 85.5                  | 34                    | -7.9                  |      |          |                       |                       |                       |
| 1988 | winter   | 87.5                  | 33.9                  | -6.1                  |      |          |                       |                       |                       |

**Table S2** Parameters used for calculating fexp in Summit and SE-Dome ice core

| Parameters | Parameters     | Description                                                  | Value                | Unit              | Data origin                                                                          |
|------------|----------------|--------------------------------------------------------------|----------------------|-------------------|--------------------------------------------------------------------------------------|
| Summit     | $L$            | Summer boundary layer height                                 | $3.50\text{E}+05$    | m                 | Honrath et al., 2002                                                                 |
|            | $V_d$          | The dry deposition velocity of $\text{HNO}_3$                | 0.0063               | $\text{m s}^{-1}$ | Björkman et al., 2013                                                                |
|            | $k[\text{OH}]$ | The rate constant for the $\text{NO}_2 + \text{OH}$ reaction | $1.09373\text{E}-11$ |                   | Atkinson et al., 2004                                                                |
|            | $V_h$          | Mean horizontal wind speed                                   | 5                    | $\text{m s}^{-1}$ | McDowell et al., 2020                                                                |
|            | $[\text{OH}]$  | Measured average OH radical concentration in summer          | $6.30\text{E}+06$    | mloec<br>cm-3     | Sjostedt et al., 2006                                                                |
|            | $H$            | Horizontal characteristic                                    | 156                  | m                 | Characteristic length<br>of summit of the Greenland ice cap;<br>Honrath et al., 2002 |
| SE-Dome    | $L$            | Summer boundary layer height                                 | Same as Summit       | m                 | -                                                                                    |
|            | $V_d$          | The dry deposition velocity of $\text{HNO}_3$                | Same as Summit       | $\text{m s}^{-1}$ |                                                                                      |
|            | $k[\text{OH}]$ | The rate constant for the $\text{NO}_2 + \text{OH}$ reaction | $1.13\text{E}-11$    |                   |                                                                                      |
|            | $V_h$          | Mean horizontal wind speed                                   | 5.2                  | $\text{m s}^{-1}$ | ERA5(Hersbach et al., (2020));<br>Khalzan et al., (2022))                            |
|            | $[\text{OH}]$  | Measured average OH radical concentration in summer          | $1.02\text{E}+06$    | mloec<br>cm-3     |                                                                                      |
|            | $H$            | Horizontal characteristic                                    | 235.31               | m                 |                                                                                      |

## References :

- Atkinson, R., Baulch, D. L., Cox, R. A., Crowley, J. N., Hampson, R. F., Hynes, R. G., Jenkin, M. E., Rossi, M. J., and Troe, J.: Evaluated kinetic and photochemical data for atmospheric chemistry: Volume I – gas phase reactions of Ox, HOx, NOx and SOx species, *Atmos. Chem. Phys.*, 4, 1461–1738, <https://doi.org/10.5194/acp-4-1461-2004>, 2004. Z
- Björkman, M., Kühnel, R., Partridge, D., Roberts, T., Aas, W., Mazzola, M., Viola, A., Hodson, A., Ström, J., and Isaksson, E.: Nitrate dry deposition in Svalbard, *Tellus B*, 65, 19071, <https://doi.org/10.3402/tellusb.v65i0.19071>, 2013.
- Hersbach, H., Bell, B., Berrisford, P., Hirahara, S., Horányi, A., Muñoz-Sabater, J., Nicolas, J., Peubey, C., Radu, R., Schepers, D., Simmons, A., Soci, C., Abdalla, S., Abellan, X., Balsamo, G., Bechtold, P., Biavati, G., Bidlot, J., Bonavita, M., De Chiara, G., Dahlgren, P., Dee, D., Diamantakis, M., Dragani, R., Flemming, J., Forbes, R., Fuentes, M., Geer, A., Haimberger, L., Healy, S., Hogan, R. J., Holm, E., Janisková, M., Keeley, S., Laloyaux, P., Lopez, P., Lupu, C., Radnoti, G., de Rosnay, P., Rozum, I., Vamborg, F., Villaume, S., and Thépaut, J.-N.: The ERA5 global reanalysis, *Q. J. R. Meteorol. Soc.*, 146, 1999–2049, doi:10.1002/qj.3803, 2020.
- Honrath, R., Lu, Y., Peterson, M. C., Dibb, J. E., Arsenault, M., Cullen, N., and Steffen, K.: Vertical fluxes of NOx, HONO, and HNO3 above the snowpack at Summit, Greenland, *Atmos. Environ.*, 36, 2629–2640, [https://doi.org/10.1016/S1352-2310\(02\)00132-2](https://doi.org/10.1016/S1352-2310(02)00132-2), 2002.
- Kahl, J. D. W., Martinez, D. A., Kuhns, H., Davidson, C. I., Jaffrezo, J.-L., and Harris, J. M.: Air mass trajectories to Summit, Greenland: A 44-year climatology and some episodic events, *J. Geophys. Res. Oceans*, 102, 26861–26875, <https://doi.org/10.1029/97JC00296>, 1997.
- McDowell, I. E., Albert, M. R., Lieblappen, S. A., and Keegan, K. M.: Local Weather Conditions Create Structural Differences between Shallow Firn Columns at Summit, Greenland and WAIS Divide, Antarctica, *Atmosphere*, 11, 1370, <https://doi.org/10.3390/atmos11121370>, 2020.
- Sjostedt, S.J.; Huey, L.G.; Tanner, D.J.; Peischl, J.; Chen, G.; Dibb, J.E.; Lefer, B.; Hutterli, M.A.; Beyersdorf, A.J.; Blake, N.J.; Blake, D.R.; Sueper, D.; Ryerson, T.; Burkhardt, J.; Stohl, A. Observations of hydroxyl and the sum of peroxy radicals at Summit, Greenland during summer 2003. *Atmos. Environ.*, 41(24), 5122–5137. 10.1016/j.atmosenv.2006.06.065, 2007.
